# Supplementary material for: Controlling the Collective Behaviors of Ultrasound-Driven Nanomotors via Frequency Regulation
Source: MDPI journal article supplement (doi:10.3390/mi15020262), 2024-02-10
Supplement: s1 [file s1]

# Controlling the Collective Behaviors of Ultrasound-Driven Nanomotors by Frequency Regulation

Zhihong Zhao <sup>1</sup>, Jie Chen <sup>1</sup>, Gaocheng Zhan <sup>1</sup>, Shuhao Gu <sup>1</sup>, Jiawei Cong <sup>2</sup>, Min Liu <sup>1,\*</sup> and  
Yiman Liu <sup>1,\*</sup>

<sup>1</sup> Hubei Engineering Research Center of Weak Magnetic-Field Detection,  
College of Science, China Three Gorges University, Yichang 443002, China

<sup>2</sup> School of Mechanical Engineering, Jiangsu University, Zhenjiang 212013,  
China

\* Correspondence: lmin@ctgu.edu.cn (M.L.); lym@ctgu.edu.cn (Y.L.)

## Supporting Videos

**Video S1. Three distinct collective behaviors of nanomotors in ultrasonic field with different frequencies.** Part 1, Vortex-shaped rotation (1.3MHz); Part 2, Stripe-like chains (1.4 MHz); Part 3, Assembly into clusters and disassembling (2.8MHz).

**Video S2. The transformation of collective behavior between different patterns.**

**Video S3. Changing the direction of stripe-like patterns from the  $x$ -axis direction to the  $y$ -axis direction.**

## Supporting Figures

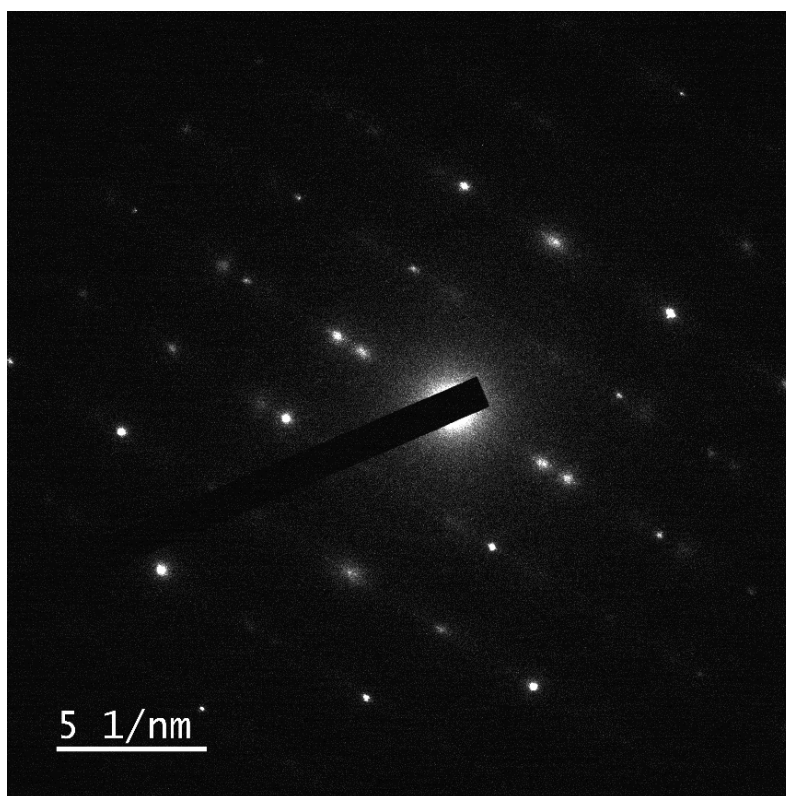

Figure S1. Lattice diffraction patterns captured by high-resolution transmission electron microscopy.

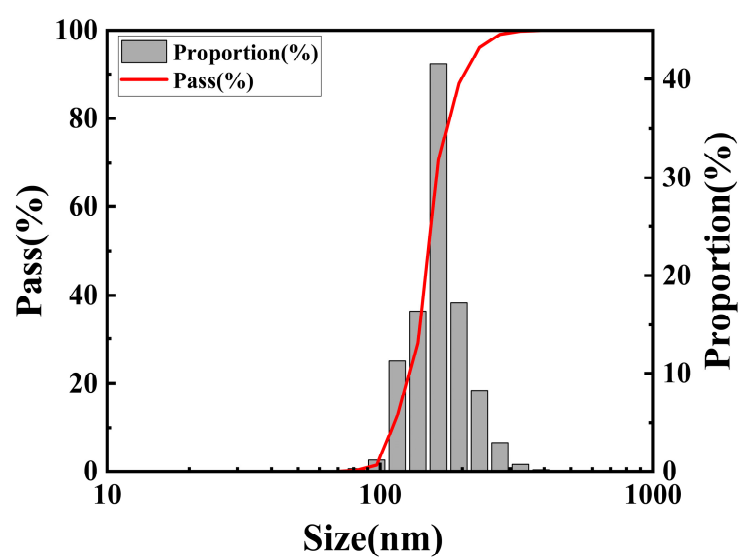

Figure S2. Lattice diffraction patterns captured by high-resolution transmission electron microscopy
