# Supplementary material for: Controlling the Collective Behaviors of Ultrasound-Driven Nanomotors via Frequency Regulation
Source: Micromachines (Basel). 2024 Feb 10;15(2):262. doi: 10.3390/mi15020262 (PMC10892131; doi:10.3390/mi15020262)
Supplement: Supplementary file 1 [file micromachines-15-00262-s001.zip]

Archive with 4 entries (4 files):
- Supporting information.pdf
- Video S1.mp4
- Video S2.mp4
- Video S3.mp4
